# Supplementary material
Source: PubMed Central journal article supplement (PMC4280355)

Diagnosed 2003–2007 w/ five-year follow-up  
N = 11726

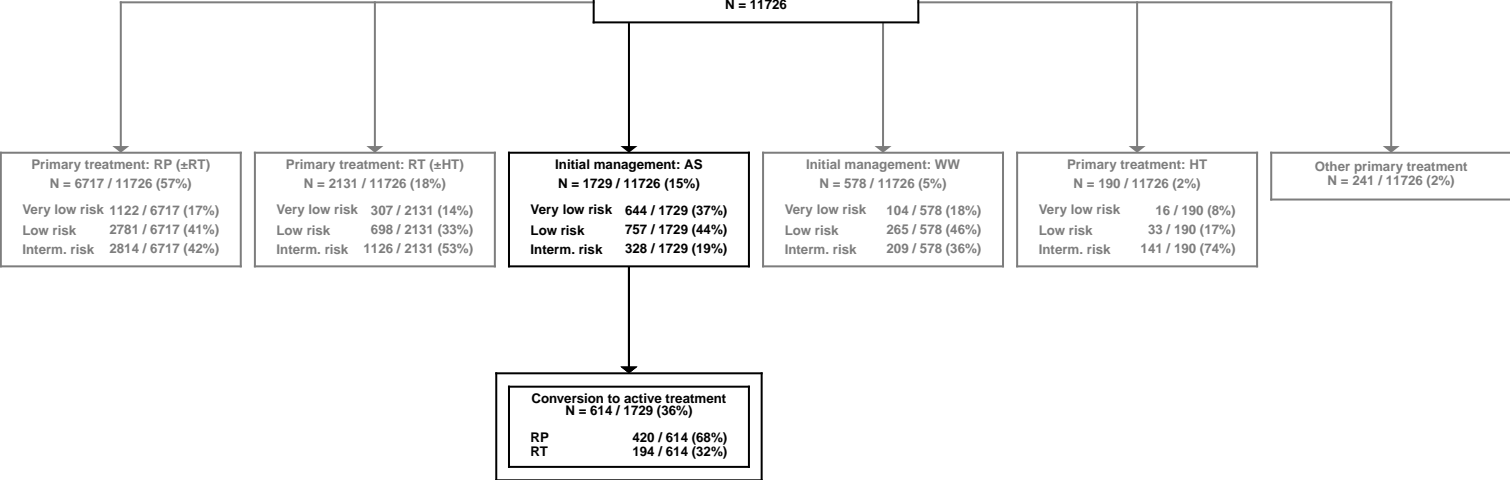

Supplement: NIHMS611552-supplement-01.pdf [file NIHMS611552-supplement-01.pdf]
